# Supplementary material for: Signature identification based on immunogenic cell death-related lncRNAs to predict the prognosis and immune activity of patients with endometrial carcinoma
Source: PubMed Central journal article supplement — Transl Cancer Res. 2024 Jun 27;13(6):2913–37. doi: 10.21037/tcr-23-2243 (PMC11231768; doi:10.21037/tcr-23-2243), 2024-06-27
Supplement: tcr-13-06-2913-supplementary.pdf [file tcr-13-06-2913-supplementary.pdf]

**Table S1** Univariate Cox proportional hazard regression analysis results of immunogenic cell death-related lncRNAs in endometrial carcinoma

| id          | HR          | HR.95L      | HR.95H      | P value |
|-------------|-------------|-------------|-------------|---------|
| AC004585.1  | 0.137544605 | 0.028907838 | 0.654442514 | 0.01    |
| SCARNA9     | 0.609948644 | 0.375630052 | 0.990435524 | 0.046   |
| FAM198B-AS1 | 0.038476824 | 0.003259061 | 0.454261509 | 0.01    |
| FKBP14-AS1  | 6.85210706  | 1.262031183 | 37.20301987 | 0.03    |
| DLEU2       | 2.951432972 | 1.008909633 | 8.634030548 | 0.048   |
| AC010615.2  | 2.235437172 | 1.103270917 | 4.529421806 | 0.03    |
| AL035530.2  | 6.488149496 | 1.171351622 | 35.9380421  | 0.03    |
| AC007611.1  | 0.109107868 | 0.014086926 | 0.845076266 | 0.03    |
| SOCAR       | 0.007758384 | 0.000123896 | 0.485829692 | 0.02    |
| UNQ6494     | 0.000839063 | 2.03E-06    | 0.347128919 | 0.02    |
| AC012645.3  | 0.042936915 | 0.002151408 | 0.856917101 | 0.04    |
| AC007996.1  | 1.566942263 | 1.016678532 | 2.415028919 | 0.042   |
| FBXO30-DT   | 6.908472159 | 1.039536648 | 45.91178932 | 0.045   |
| LINC01943   | 0.063296412 | 0.006455071 | 0.620664841 | 0.02    |
| AL161431.1  | 1.459764949 | 1.04847224  | 2.032398784 | 0.03    |
| AC006369.1  | 0.016749967 | 0.000316831 | 0.885524833 | 0.043   |

lncRNAs, long non-coding RNAs; HR, hazard ratio; 95L, the lowest value of the 95% confidence interval; 95H, the highest value of the 95% confidence interval.

**Table S2** qRT-PCR primers used in this study

| Gene name      | Forward primer                          | Reverse primer                          |
|----------------|-----------------------------------------|-----------------------------------------|
| SCARNA9        | 5'-AAG GGC ATA TGT CTG GTG TGT GTG-3'   | 5'-CCC CAC CCT CAA TCT CAT TCA TTC C-3' |
| FAM198B-AS1    | 5'-GGA ATG AAG CCA CCC TTG ACT GAG-3'   | 5'-GTC TTC TGT GCC GTG TCT CCT TG-3'    |
| FKBP14-AS1     | 5'-CGA GAC CAG CCT GAC CAA CAT G-3'     | 5'-CTA CAG ACA CAT GCC ACC ACA CTC-3'   |
| FBXO30-DT      | 5'-ACC AGG GTC TGC TTC TGT GAG G-3'     | 5'-CAG TTT GGC ATG GCT GGA GAG G-3'     |
| LINC01943      | 5'-TGG CAT CAG TCT GGT TGG ATT ACA C-3' | 5'-CAG CAG GTA TCA GGC ACA GCA TC-3'    |
| AL161431.1     | 5'-GGC TCT CTG GCA AGA ACC ACA AG-3'    | 5'-GAA CGG TGT TGG GTC TGT CAG TAG-3'   |
| $\beta$ -actin | 5'-ACC GAG CGT GGC TAC AGC TTC ACC-3'   | 5'-AGC ACC CGT GGC CAT CTC TTT CTC G-3' |

qRT-PCR, quantitative real-time polymerase chain reaction.

**Table S3** ShRNA sequences used for cell transfection

| ShRNA           | Sequence (5'-3')                                                                                                                                                 |
|-----------------|------------------------------------------------------------------------------------------------------------------------------------------------------------------|
| sh-FKBP14-AS1-1 | F-CCG GAG AAT CAG ACA GAA AAT CCC TCG AGG GAT TTT CTG TCT GAT TCT TTT TTG<br>R-AAT TCA AAA AAA GAA TCA GAC AGA AAA TCC CTC GAG GGA TTT TCT GTC TGA TTC T         |
| sh-FKBP14-AS1-2 | F-CCG GAG ACC AAA ACA GTA TTT TAC TCG AGT AAA ATA CTG TTT TGG TCT TTT TTG<br>R-AAT TCA AAA AAA GAC CAA AAC AGT ATT TTA CTC GAG TAA AAT ACT GTT TTG GTC T         |
| sh-FKBP14-AS1-3 | F-CCG GTC TAC TAA AAA TAC AAA AAC TCG AGT TTT TGT ATT TTT AGT AGA TTT TTG<br>R-AAT TCA AAA AAT CTA CTA AAA ATA CAA AAA CTC GAG TTT TTG TAT TTT TAG TAG A         |
| sh-FBXO30-DT-1  | F-CCG GGG ACC TTT TTT CCT TTC GAC TCG AGT CGA AAG GAA AAA AGG TCC TTT TTG<br>R-AAT TCA AAA AAG GAC CTT TTT TCC TTT CGA CTC GAG TCG AAA GGA AAA AAG GTC C         |
| sh-FBXO30-DT-2  | F-CCG GAG AAG CAT AAG CTG CAA TAC TCG AGT ATT GCA GCT TAT GCT TCT TTT TTG<br>R-AAT TCA AAA AAA GAA GCA TAA GCT GCA ATA CTC GAG TAT TGC AGC TTA TGC TTC T         |
| sh-FBXO30-DT-3  | F-CCG GGC TGC AAT AAA AAT TTG GTC TCG AGA CCA AAT TTT TAT TGC AGC TTT TTG<br>R-AAT TCA AAA AAG CTG CAA TAA AAA TTT GGT CTC GAG ACC AAA TTT TTA TTG CAG C         |
| sh-AL161431.1-1 | F-CCG GGG AAA TAT CCC ATT AGA TTC TCG AGA ATC TAA TGG GAT ATT TCC TTT TTG<br>R-AAT TCA AAA AAG GAA ATA TCC CAT TAG ATT CTC GAG AAT CTA ATG GGA TAT TTC CTT TTT G |
| sh-AL161431.1-2 | F-CCG GGC TAG GAT ACA AGA GAA ACC TCG AGG TTT CTC TTG TAT CCT AGC TTT TTG<br>R-AAT TCA AAA AAG CTA GGA TAC AAG AGA AAC CTC GAG GTT TCT CTT GTA TCC TAG C         |
| sh-AL161431.1-3 | F-CCG GGC CTG AAA TCA TTT ATT TCC TCG AGG AAA TAA ATG ATT TCA GGC TTT TTG<br>R-AAT TCA AAA AAG CCT GAA ATC ATT TAT TTC CTC GAG GAA ATA AAT GAT TTC AGG C         |

ShRNA, short hairpin RNA.

**Table S4** The risk model for immunogenic cell death-related lncRNAs

| Immunogenic cell death-related lncRNA | Coefficient        |
|---------------------------------------|--------------------|
| SCARNA9                               | -0.401528645653866 |
| FAM198B-AS1                           | -1.90526441273924  |
| FKBP14-AS1                            | 2.21856134166291   |
| FBXO30-DT                             | 1.63157340507073   |
| LINC01943                             | -2.36050864717649  |
| AL161431.1                            | 0.600416817300287  |

lncRNAs, long non-coding RNAs.

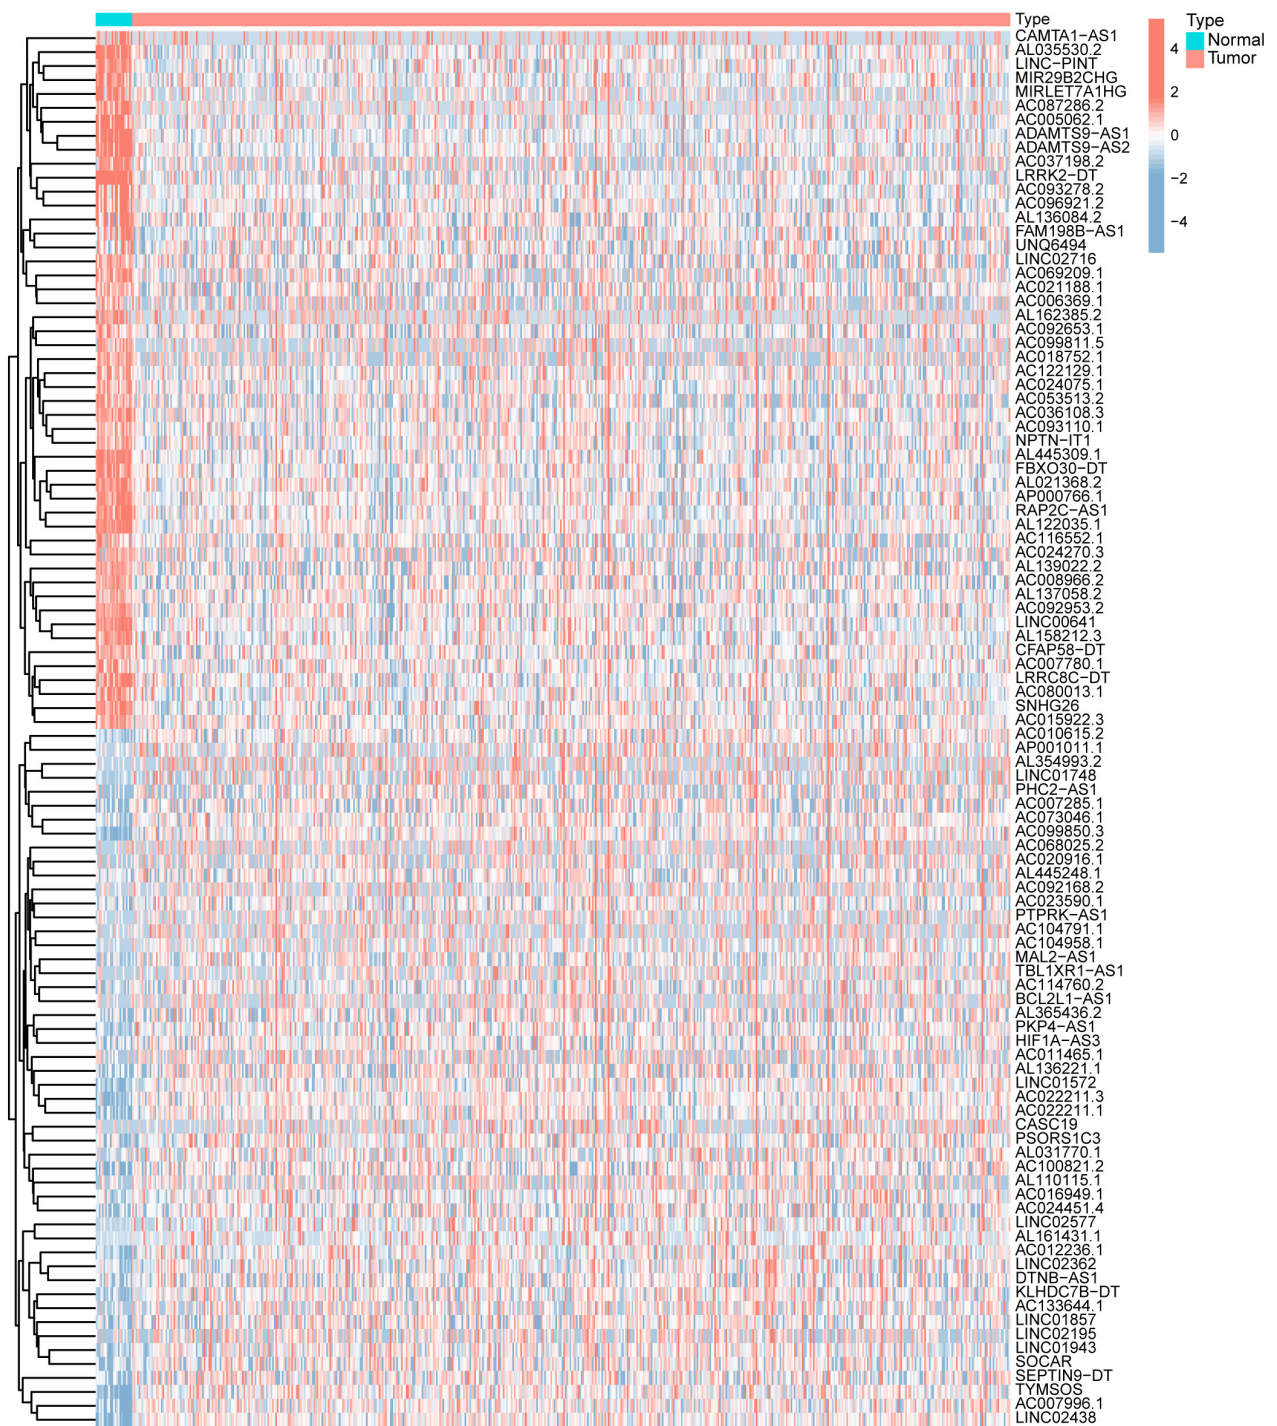

**Figure S1** Heatmap shows differential expression of immunogenic cell death-related lncRNAs in tumor tissues and normal tissues. lncRNAs, long non-coding RNAs.

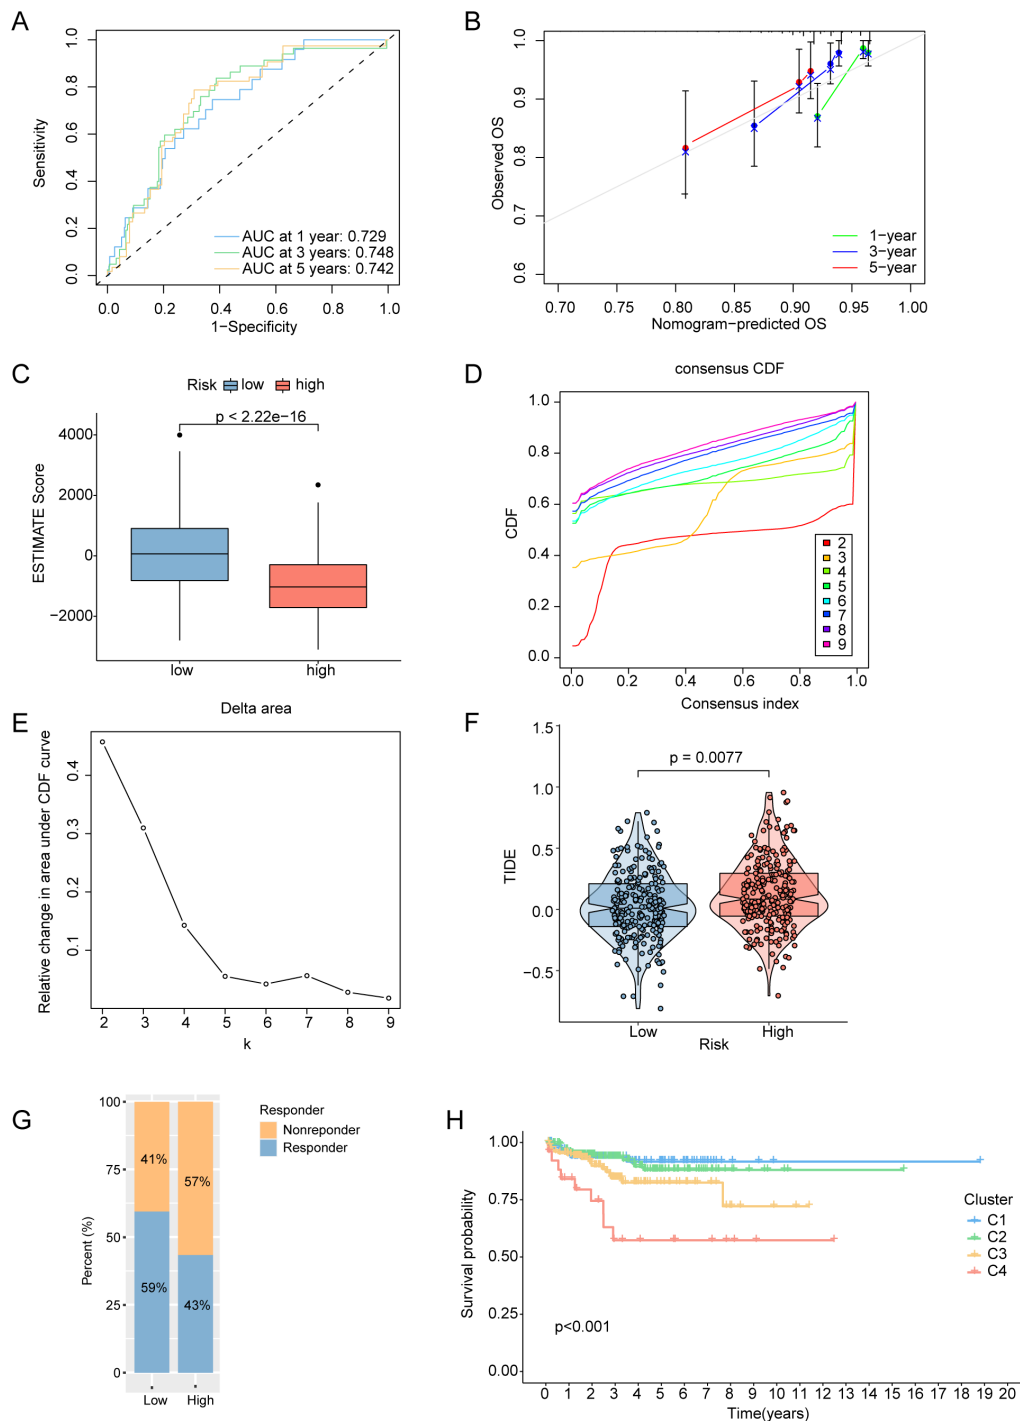

**Figure S2** The validation curve of the predictive model, immune scores for high and low-risk groups, and the survival curve of four clusters. (A) ROC curve at 1, 3, 5 years. (B) The calibration curve of the nomogram. (C) Box plots of ESTIMATE score for the low- and high-risk groups. (D) The CDF curves when  $k = 2-9$ . (E) Relative changes in area under CDF curves. (F) The TIDE scores between high- and low-risk groups. (G) In high- and low-risk groups, the ICI therapy responders was predicted by the TIDE algorithm. (H) The survival curve of 4 subtypes. AUC, area under the curve; OS, overall survival; ESTIMATE, Estimation of STromal and Immune cells in MAlignant Tumour tissues using Expression data; CDF, cumulative distribution function; ROC, receiver operating characteristic; TIDE, Tumor Immune Dysfunction and Exclusion; ICI, immune checkpoint inhibitor.

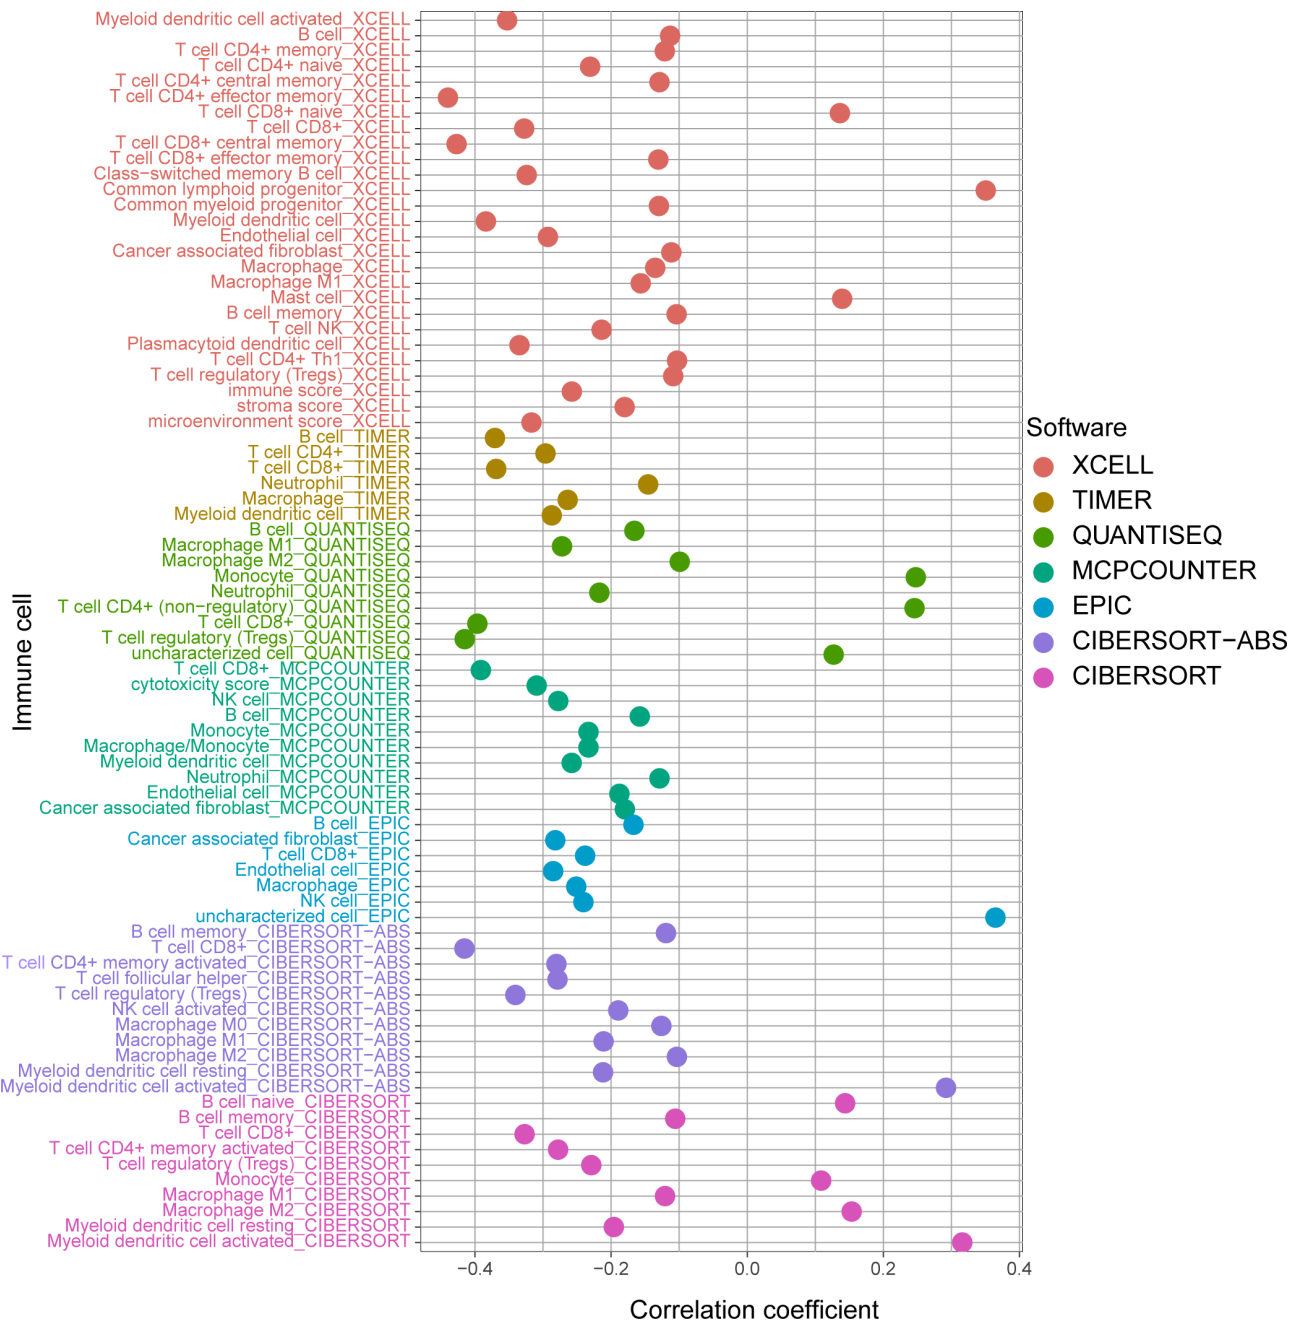

**Figure S3** The bubble gram of immune cells in low- and high-risk groups.

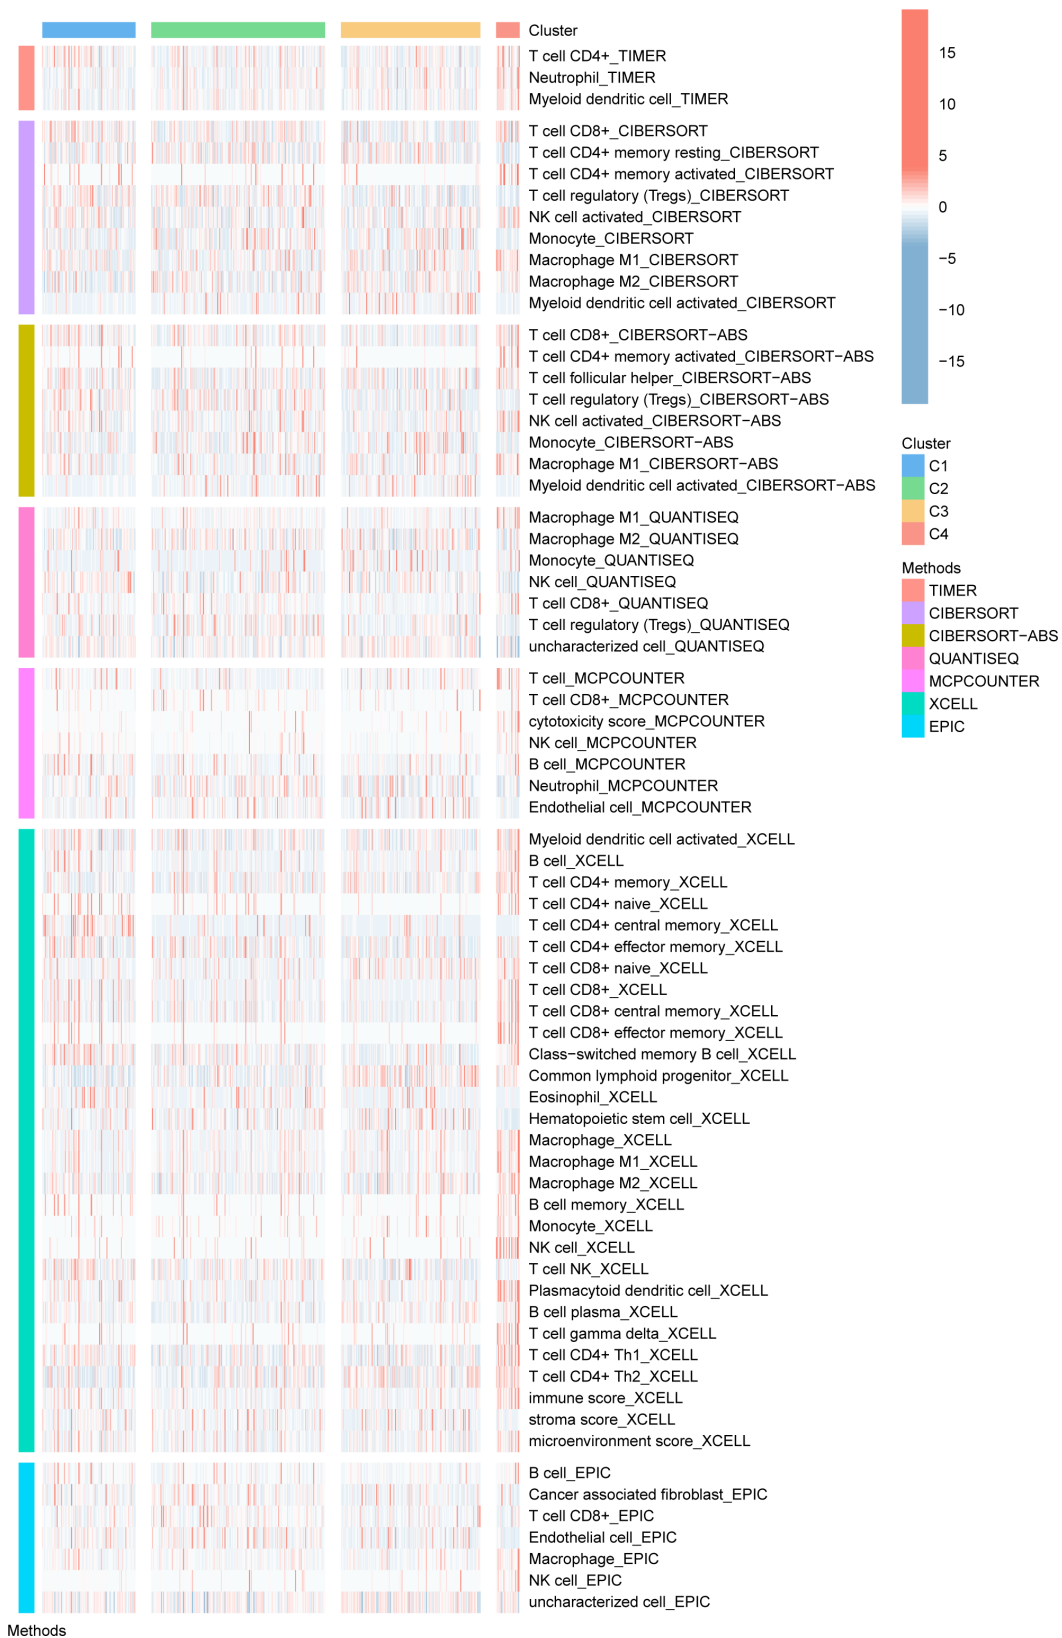

**Figure S4** The heat map of immune cell infiltration in 4 clusters.

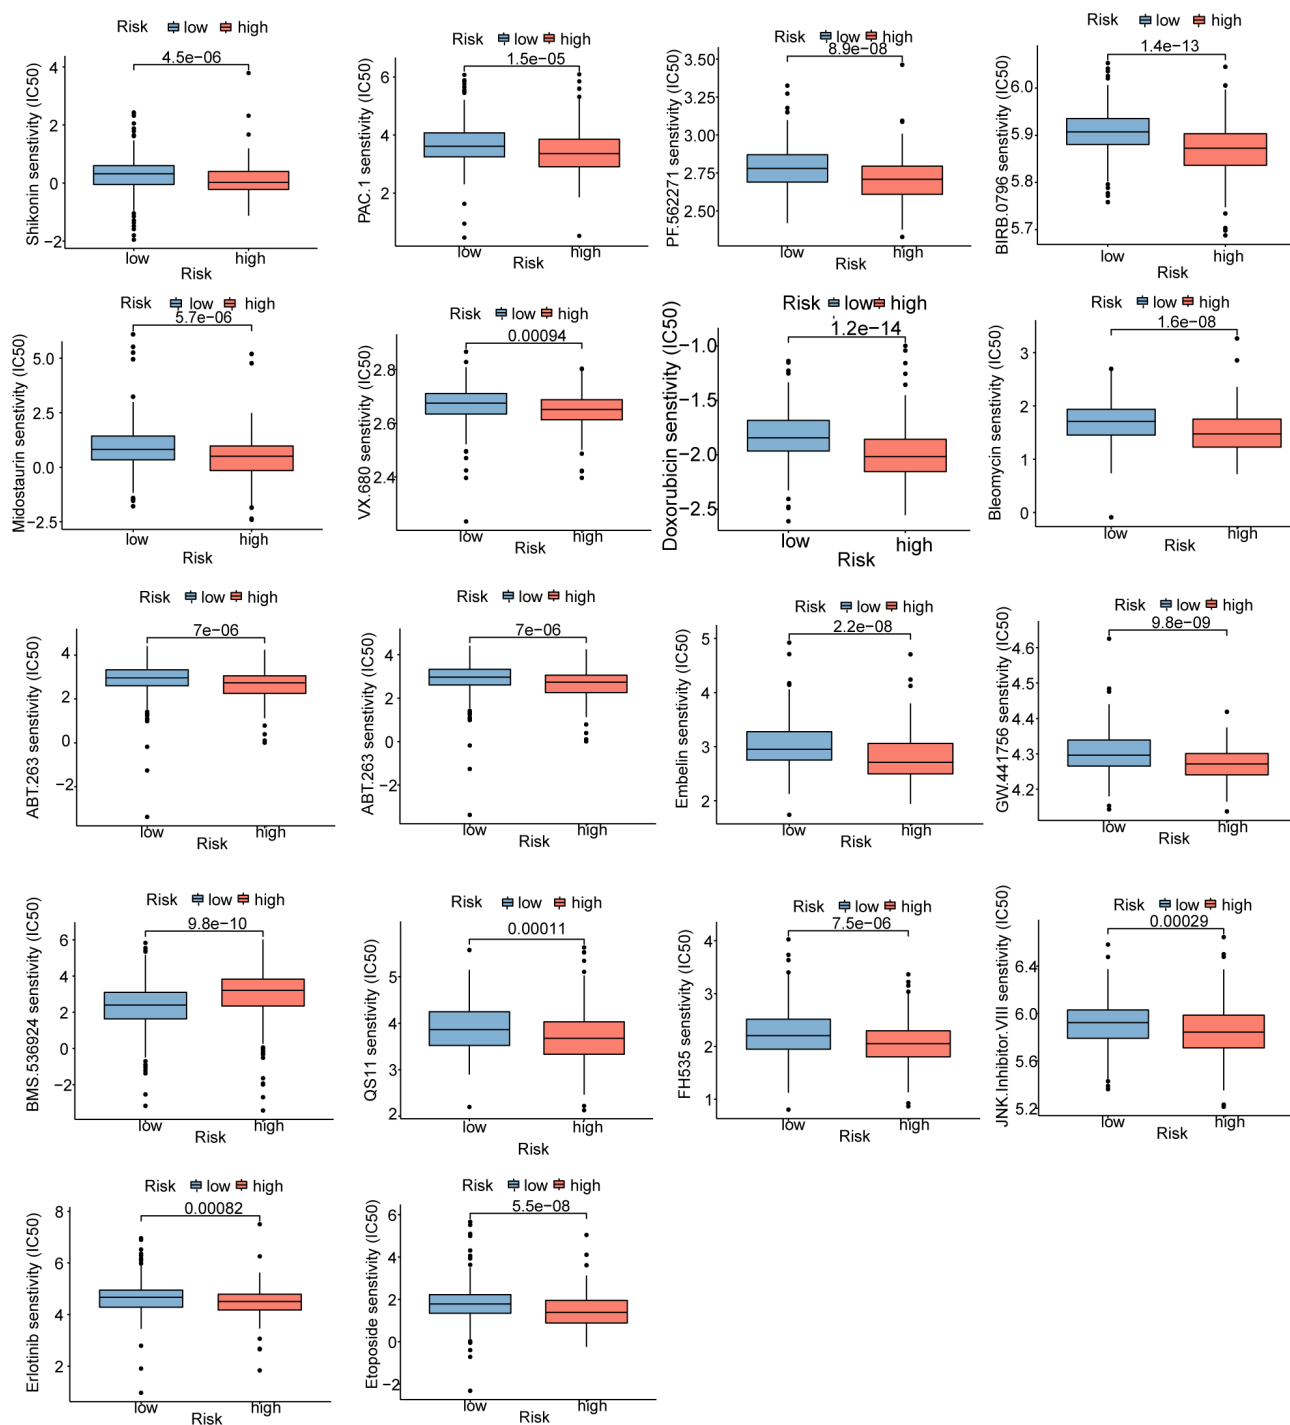

**Figure S5** Compounds with IC50 in the high-risk group. IC50, half inhibitory concentration.

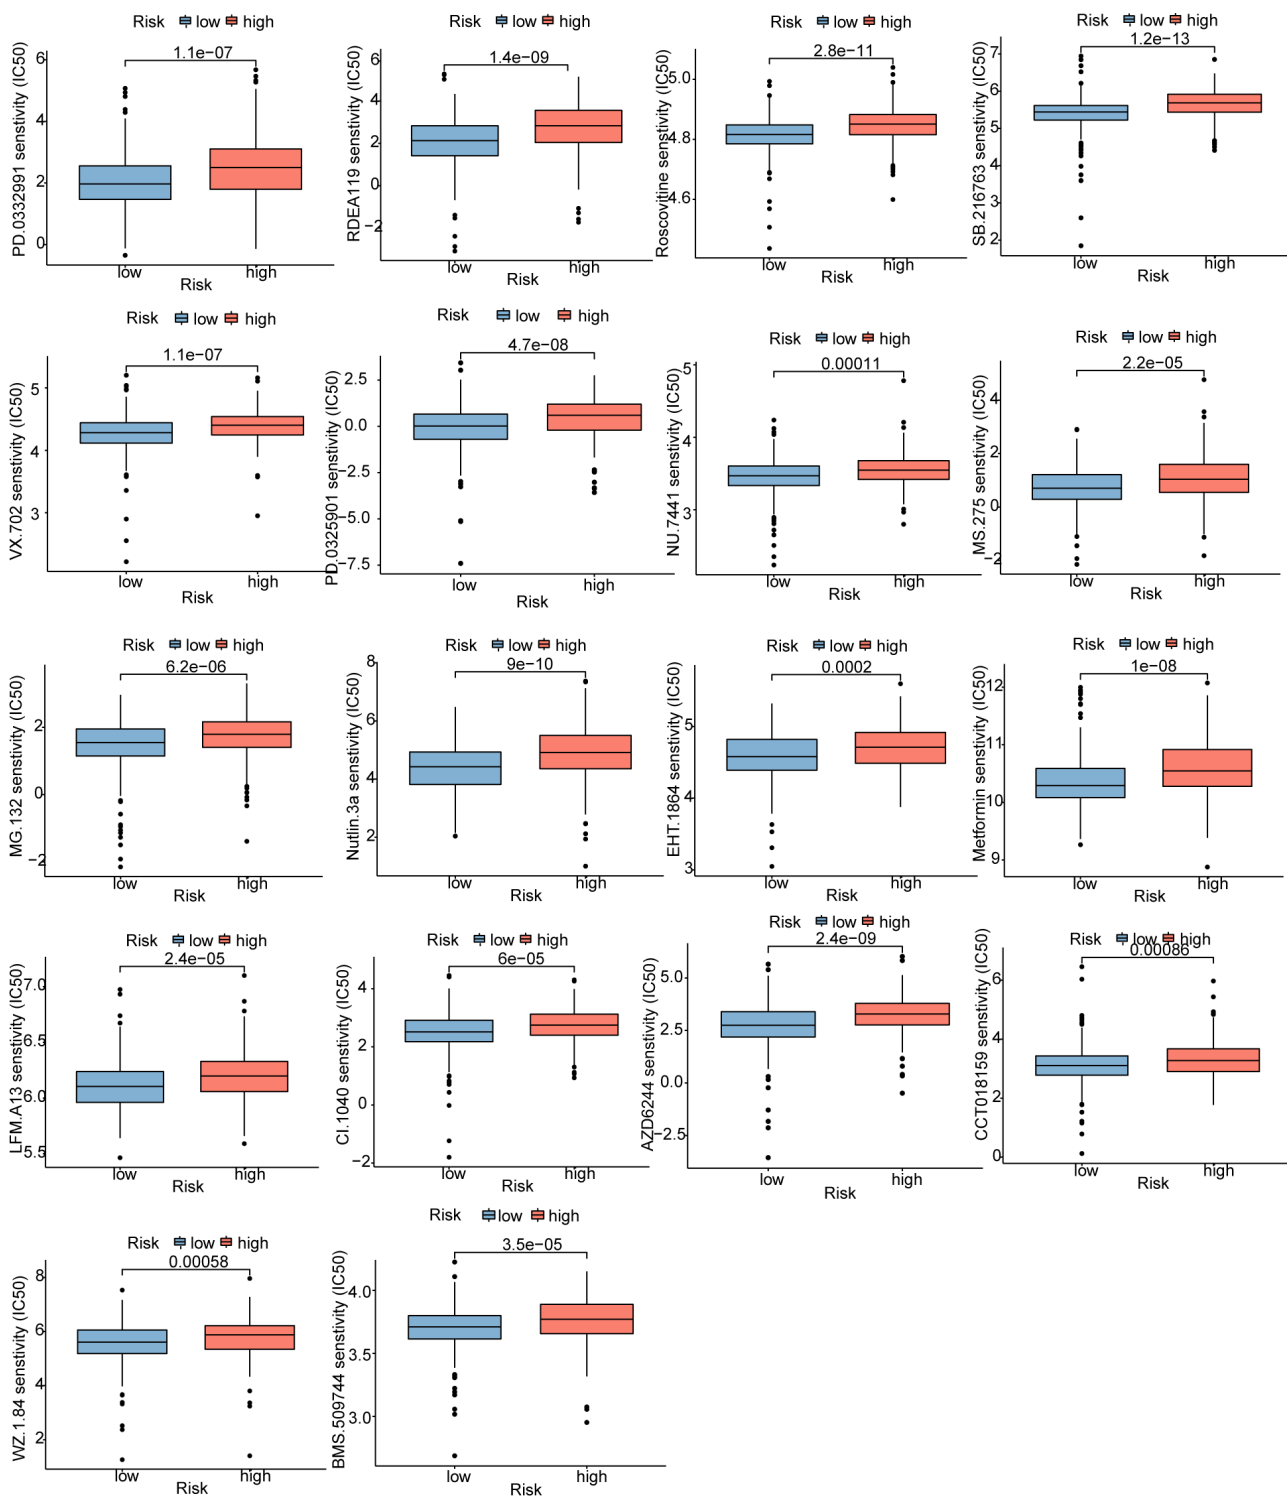

**Figure S6** Compounds with lower IC50 in low-risk group. IC50, half inhibitory centration.



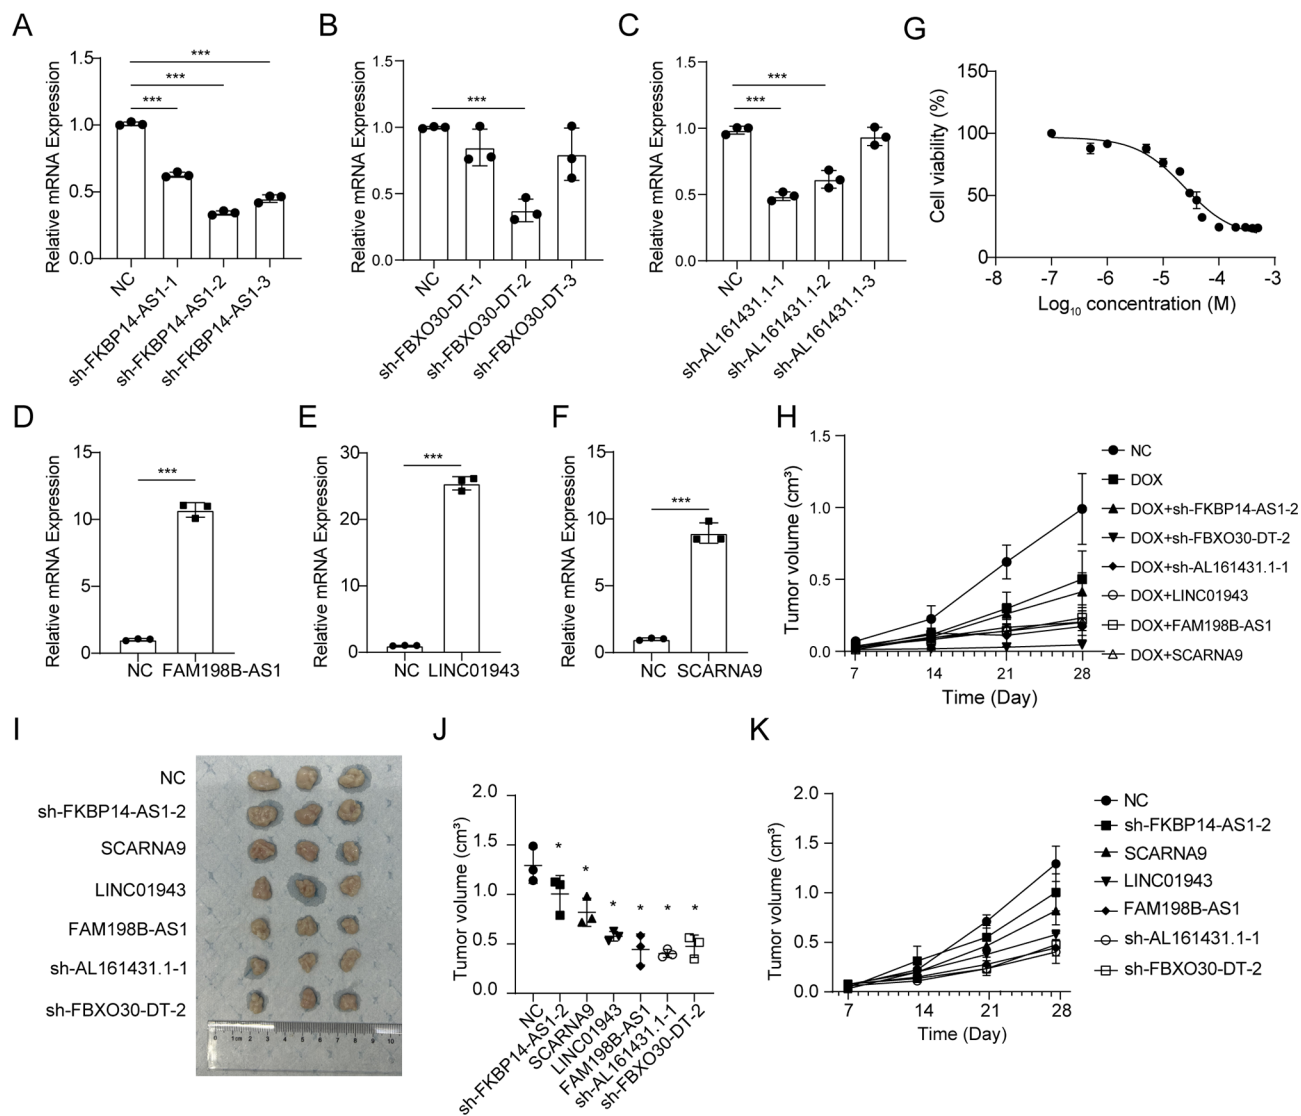

**Figure S7** *In vivo* and *in vitro* experiments. (A-C). The efficiency of knocked down. (D-F) The efficiency of overexpression. (G) Viability of KLE cells after 48 h incubation with different DOX formulations. (H) Growth curves of the tumor measured in BALB/c nude mice. (I) Xenograft tumors without DOX treatment at the endpoint. (J) Tumor volume measured in BALB/c nude mice without DOX treatment. (K) Growth curves of the tumor measured in BALB/c nude mice without DOX treatment. \*,  $P < 0.05$ ; \*\*\*,  $P < 0.001$ . NC, negative control; DOX, doxorubicin.
